# Supplementary material for: Step counter use in type 2 diabetes: a meta-analysis of randomized controlled trials
Source: BMC Med. 2014 Feb 27;12:36. doi: 10.1186/1741-7015-12-36 (PMC4016223; doi:10.1186/1741-7015-12-36)
Supplement: Additional file 3 — Criteria for judging risk of bias of each item using the ‘Risk of bias’ assessment tool. [file 1741-7015-12-36-S3.pdf]

Criteria for judging risk of bias of each item using the ‘Risk of bias’  
assessment tool\*

|                                               | Low risk                                                                                                                                                                                                                                                                                                                                                                                                                                                                                                                                                                                                                                                          | Unclear risk                                                                                                                        | High risk                                                                                                                                                                                                                                                                                                                                                                                                                                                                                                                                                                                                                                                                                                                                                          |
|-----------------------------------------------|-------------------------------------------------------------------------------------------------------------------------------------------------------------------------------------------------------------------------------------------------------------------------------------------------------------------------------------------------------------------------------------------------------------------------------------------------------------------------------------------------------------------------------------------------------------------------------------------------------------------------------------------------------------------|-------------------------------------------------------------------------------------------------------------------------------------|--------------------------------------------------------------------------------------------------------------------------------------------------------------------------------------------------------------------------------------------------------------------------------------------------------------------------------------------------------------------------------------------------------------------------------------------------------------------------------------------------------------------------------------------------------------------------------------------------------------------------------------------------------------------------------------------------------------------------------------------------------------------|
| <b>Random sequence generation</b>             | 1. Simple randomization;<br>2. Restricted randomization;<br>3. Stratified randomization                                                                                                                                                                                                                                                                                                                                                                                                                                                                                                                                                                           | Insufficient information to judge ‘Low risk’ or ‘High risk’                                                                         | 1. Sequence generated by odd, date of birth, or by some rule based on date of admission or based on hospital or clinic record number;<br>2. Allocation by judgement of the clinician or by preference of the participant, or by availability of the intervention;<br>3. Allocation based on the results of a laboratory test or a series of tests.                                                                                                                                                                                                                                                                                                                                                                                                                 |
| <b>Allocation concealment</b>                 | 1. Central allocation (including telephone, web-based and pharmacy-controlled randomization);<br>2. Sequentially numbered drug containers of identical appearance;<br>3. Sequentially numbered, opaque, sealed envelopes.                                                                                                                                                                                                                                                                                                                                                                                                                                         | Insufficient information to judge ‘Low risk’ or ‘High risk’                                                                         | 1. Using an open random allocation schedule;<br>2. Assignment envelopes were used without appropriate safeguards;<br>3. Alternation or rotation<br>4. Date of birth;<br>5. Case record number;<br>6. Any other explicitly unconcealed procedure.                                                                                                                                                                                                                                                                                                                                                                                                                                                                                                                   |
| <b>Blinding of participants and personnel</b> | 1. No blinding or incomplete blinding, but the review authors judge that the outcome is not likely to be influenced by lack of blinding;<br>2. Blinding of participants and key study personnel ensured, and unlikely that the blinding could have been broken.                                                                                                                                                                                                                                                                                                                                                                                                   | 1. Insufficient information to judge ‘Low risk’ or ‘High risk’;<br>2. The study did not address this outcome.                       | 1. No blinding or incomplete blinding, and the outcome is likely to be influenced by lack of blinding;<br>2. Blinding of key study participants and personnel attempted, but likely that the blinding could have been broken, and the outcome is likely to be influenced by lack of blinding.                                                                                                                                                                                                                                                                                                                                                                                                                                                                      |
| <b>Blinding of outcome assessment</b>         | 1. No blinding of outcome assessment, but the review authors judge that the outcome measurement is not likely to be influenced by lack of blinding;<br>2. Blinding of outcome assessment ensured, and unlikely that the blinding could have been broken.                                                                                                                                                                                                                                                                                                                                                                                                          | 1. Insufficient information to judge ‘Low risk’ or ‘High risk’;<br>2. The study did not address this outcome.                       | 1. No blinding of outcome assessment, and the outcome measurement is likely to be influenced by lack of blinding;<br>2. Blinding of outcome assessment, but likely that the blinding could have been broken, and the outcome measurement is likely to be influenced by lack of blinding.                                                                                                                                                                                                                                                                                                                                                                                                                                                                           |
| <b>Incomplete outcome data</b>                | 1. No missing outcome data;<br>2. Reasons for missing outcome data unlikely to be related to true outcome;<br>3. Missing outcome data balanced in numbers across intervention groups, with similar reasons for missing data across groups;<br>4. For dichotomous outcome data, the proportion of missing outcomes compared with observed event risk not enough to have a clinically relevant impact on the intervention effect estimate;<br>5. For continuous outcome data, plausible effect size among missing outcomes not enough to have a clinically relevant impact on observed effect size;<br>6. Missing data have been imputed using appropriate methods. | 1. Insufficient reporting of attrition/exclusions to judge ‘Low risk’ or ‘High risk’;<br>2. The study did not address this outcome. | 1. Reason for missing outcome data likely to be related to true outcome, with either imbalance in numbers or reasons for missing data across intervention groups;<br>2. For dichotomous outcome data, the proportion of missing outcomes compared with observed event risk enough to induce clinically relevant bias in intervention effect estimate;<br>3. For continuous outcome data, plausible effect size (difference in means or standardized difference in means) among missing outcomes enough to induce clinically relevant bias in observed effect size;<br>4. ‘As-treated’ analysis done with substantial departure of the intervention received from that assigned at randomization;<br>5. Potentially inappropriate application of simple imputation. |

|                            |                                                                                                                                                                                                                                                                                                                                          |                                                                     |                                                                                                                                                                                                                                                                                                                                                                                                                                                                                                                                                                                                                                                                                       |
|----------------------------|------------------------------------------------------------------------------------------------------------------------------------------------------------------------------------------------------------------------------------------------------------------------------------------------------------------------------------------|---------------------------------------------------------------------|---------------------------------------------------------------------------------------------------------------------------------------------------------------------------------------------------------------------------------------------------------------------------------------------------------------------------------------------------------------------------------------------------------------------------------------------------------------------------------------------------------------------------------------------------------------------------------------------------------------------------------------------------------------------------------------|
| <b>Selective reporting</b> | <p>1. The study protocol is available and all of the study's pre-specified outcomes that are of interest in the review have been reported in the pre-specified way;</p> <p>2. The study protocol is not available but it is clear that the published reports include all expected outcomes, including those that were pre-specified.</p> | <p>Insufficient information to judge 'Low risk' or 'High risk'.</p> | <p>1. Not all of the study's pre-specified primary outcomes have been reported;</p> <p>2. One or more primary outcomes is reported using measurements, analysis methods or subsets of the data that were not pre-specified;</p> <p>3. One or more reported primary outcomes were not pre-specified (unless clear justification for their reporting is provided, such as an unexpected adverse effect);</p> <p>4. One or more outcomes of interest in the review are reported incompletely so that they cannot be entered in a meta-analysis;</p> <p>5. The study report fails to include results for a key outcome that would be expected to have been reported for such a study.</p> |
|----------------------------|------------------------------------------------------------------------------------------------------------------------------------------------------------------------------------------------------------------------------------------------------------------------------------------------------------------------------------------|---------------------------------------------------------------------|---------------------------------------------------------------------------------------------------------------------------------------------------------------------------------------------------------------------------------------------------------------------------------------------------------------------------------------------------------------------------------------------------------------------------------------------------------------------------------------------------------------------------------------------------------------------------------------------------------------------------------------------------------------------------------------|

\*The criteria for judging risk of bias are adapted from: **Cochrane Handbook for Systematic Reviews of Interventions Version 5.1.0 [updated March 2011]**  
[\[http://handbook.cochrane.org/\]](http://handbook.cochrane.org/)
