# Supplementary material for: Step counter use in type 2 diabetes: a meta-analysis of randomized controlled trials
Source: BMC Med. 2014 Feb 27;12:36. doi: 10.1186/1741-7015-12-36 (PMC4016223; doi:10.1186/1741-7015-12-36)
Supplement: Additional file 4 — Univariate meta-regression analyses in PA by different covariates in patients with T2D. [file 1741-7015-12-36-S4.pdf]

### Univariate meta-regression analyses in PA by different covariates in patients with T2D

| Covariates            | No. of studies | Regression coef <sup>a</sup> | 95% CI                | <i>P</i> | Adjusted $R^2$ (%) <sup>b</sup> | $I^2_{\text{res}}$ (%) <sup>c</sup> |
|-----------------------|----------------|------------------------------|-----------------------|----------|---------------------------------|-------------------------------------|
| Goal setting          | 7              | 2,628.00                     | 985.61 to 4,270.39    | 0.009    | 86.91                           | 86.91                               |
| Sample size           | 7              | -9.91                        | -26.92 to 7.10        | 0.195    | 15.14                           | 15.14                               |
| Intervention duration | 7              | -282.03                      | -752.92 to 188.87     | 0.184    | 19.42                           | 19.42                               |
| Diary use             | 7              | 2,090.99                     | -2,071.58 to 6,253.55 | 0.253    | 8.63                            | 8.63                                |
| Study quality         | 7              | -76.91                       | -1,995.48 to 1,841.65 | 0.922    | -24.86                          | -24.86                              |

Abbreviation: PA, physical activity; T2D, type 2 diabetes; regression coef, regression coefficient; CI, confidence interval.

<sup>a</sup> The regression coefficient obtained from the meta-regression analysis describes how the outcome variable (PA (steps per day)) changes with a unit increase in the explanatory variable.

<sup>b</sup> Proportion of between-study variance explained.

<sup>c</sup> % residual variation due to heterogeneity.
